# Supplementary material
Source: PubMed Central journal article supplement (PMC6645530)
Supplement: ao8b01452_si_001.pdf [file ao8b01452_si_001.pdf]

**Supporting Information.**

# Sb-doped titanium oxide: a rationale for its photocatalytic activity for environmental remediation

*Massimo Zimbone,<sup>a</sup> Giuseppe Cacciato,<sup>a</sup> Luca Spitaleri,<sup>b</sup> Russell G. Egdell,<sup>\*c</sup> Maria Grazia Grimaldi,<sup>\*d</sup> Antonino Gulino,<sup>\*b</sup>*

<sup>a</sup> CNR-IMM, via S. Sofia 64, 95123 Catania, Italy.

<sup>b</sup> Dipartimento di Scienze Chimiche, and INSTM, UdR of Catania, Viale Andrea Doria, 6 Catania, Italy.

<sup>c</sup> Department of Chemistry, University of Oxford, Inorganic Chemistry Laboratory, South Parks Road, Oxford OX1 3QR, UK.

<sup>d</sup> CNR-IMM, and Dipartimento di Fisica e Astronomia, Università di Catania, via S. Sofia 64, 95123 Catania, Italy.

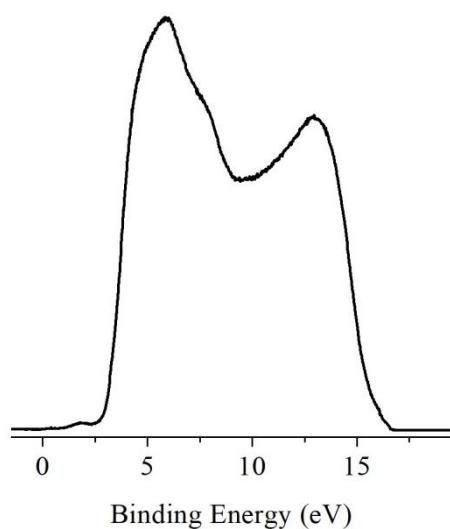

**Figure S1.** UPS He-I spectrum of 1.5% Sb-TiO<sub>2</sub> after annealing overnight at 1000°C. Structure due to satellite radiation has been subtracted from the spectrum. The position of the Fermi level was established from measurement on a silver foil. The band centred at ~ 5 eV is associated with the O 2p valence electrons. The band at ~ 12.5 eV is due to the secondary electron emission. The valence band edge was found just over 3 eV below the Fermi level thus demonstrating that the Fermi energy is pinned close to the conduction band minimum. The weak peak observed at ~ 1.8 eV is due to the Sb(III) (5s-5p)<sup>2</sup> hybrid surface states.
